# Supplementary material for: Coordination tuning of Ni/Fe complex-based electrocatalysts for enhanced oxygen evolution
Source: Royal Society of Chemistry journal article supplement (doi:10.1039/d4qi01934b), 2024-01-01
Supplement: d4qi01934b1.pdf [file d4qi01934b1.pdf]

## Supporting Information

### Coordination Tuning of Ni/Fe Complexes based Electrocatalysts for Enhanced Oxygen Evolution

Hongbo Zhou, Xuan Hao, Jiexin Guan, Yilin Deng, Zi Wei, Yashu Liu, and Guoxing Zhu\*

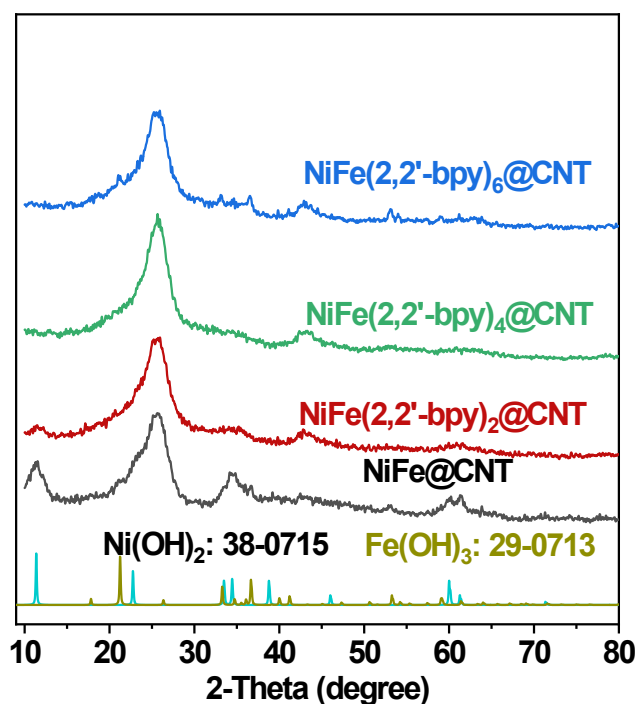

Figure S1 XRD spectra of  $\text{NiFe}(2,2'\text{-bpy})_n@\text{CNT}$  after immersion in 1M KOH

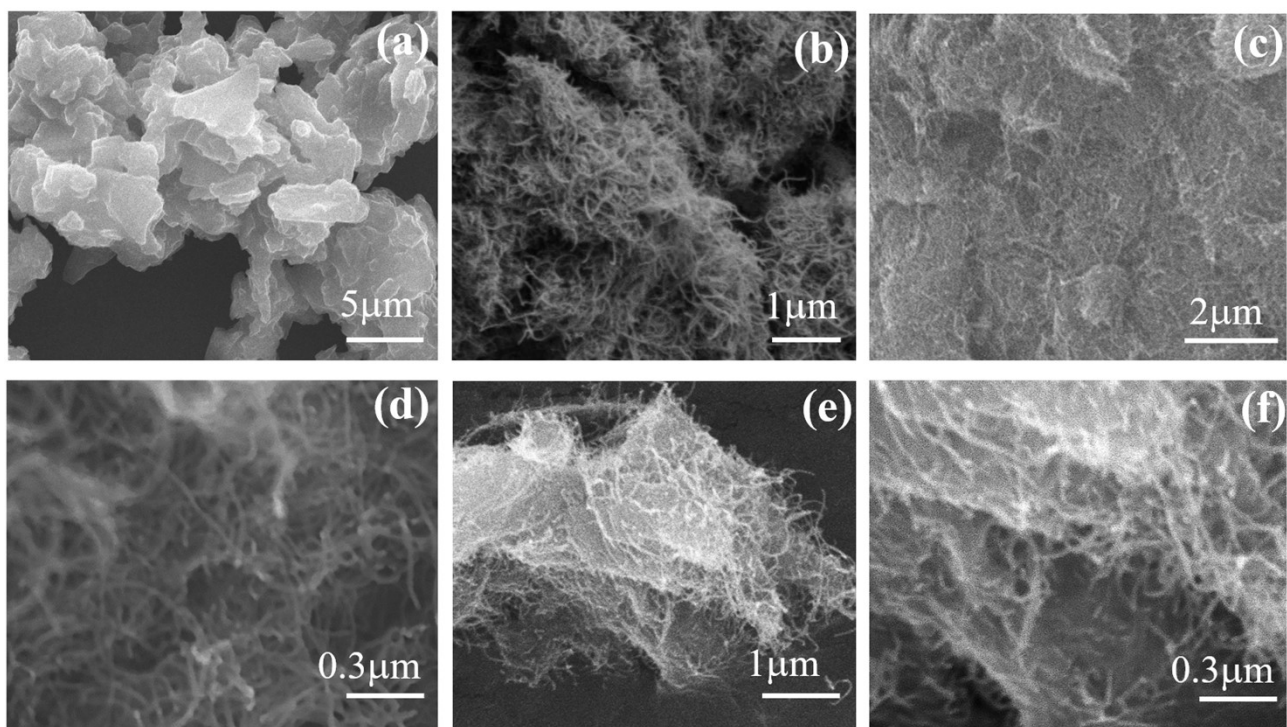

Figure S2 SEM images of pure  $\text{NiFe}(2,2'\text{-bpy})_2$  (a), MWCNTs (b) and  $\text{NiFe}(2,2'\text{-bpy})_2@CNT$  (c, d) before OER; the  $\text{NiFe}(2,2'\text{-bpy})_2@CNT$  product after OER (e, f).

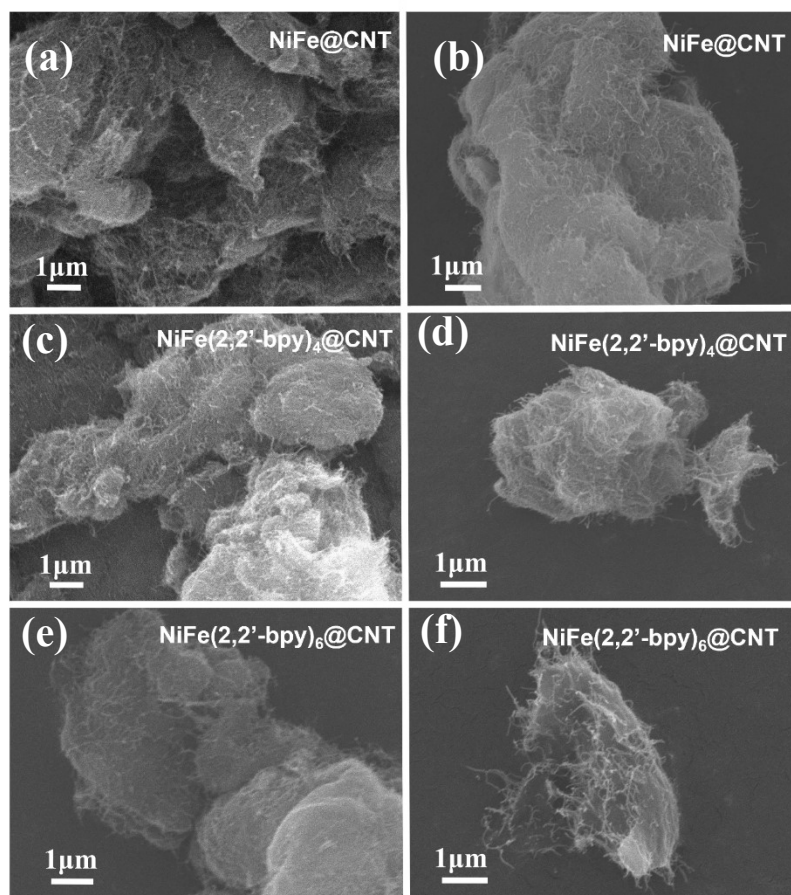

Figure S3 The SEM images of  $\text{NiFe}(2,2'\text{-bpy})_n\text{@CNT}$  with  $n = 0, 4, 6$  before (a, c, e) and after OER(b, d, f)

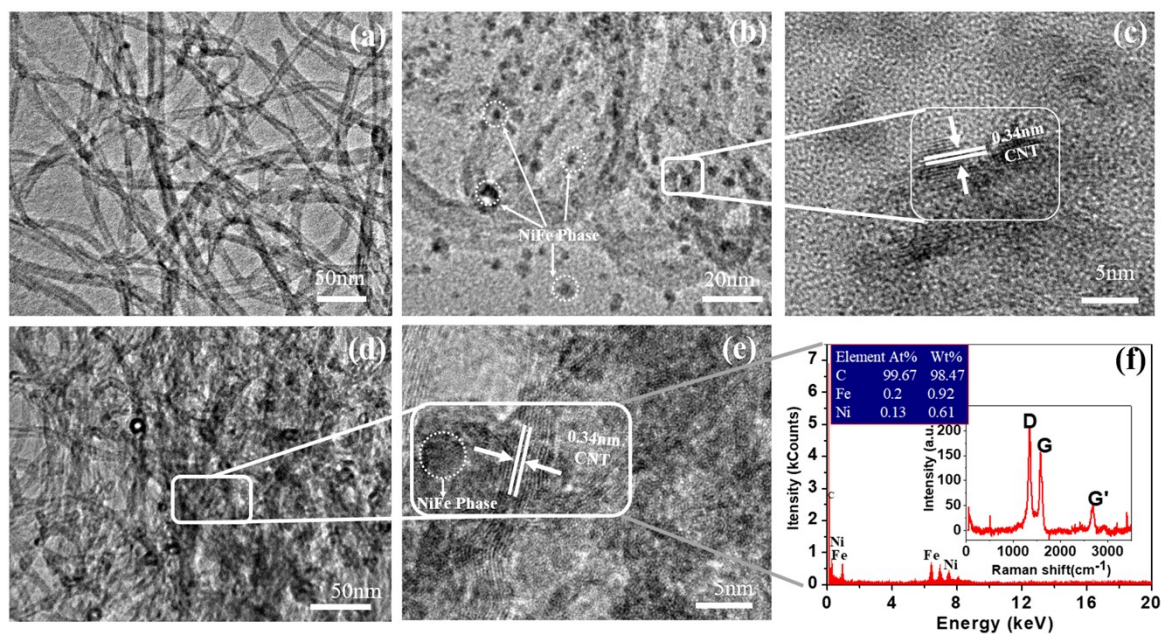

Figure S4 TEM images of pristine MWCNTs (a), NiFe(2,2'-bpy)<sub>2</sub>@CNT (b, c), NiFe(2,2'-bpy)<sub>2</sub>@CNT (after OER) (d, e), and EDS element analysis of NiFe(2,2'-bpy)<sub>2</sub>@CNT (after OER) (f) (Inset: the Raman spectra of the material)

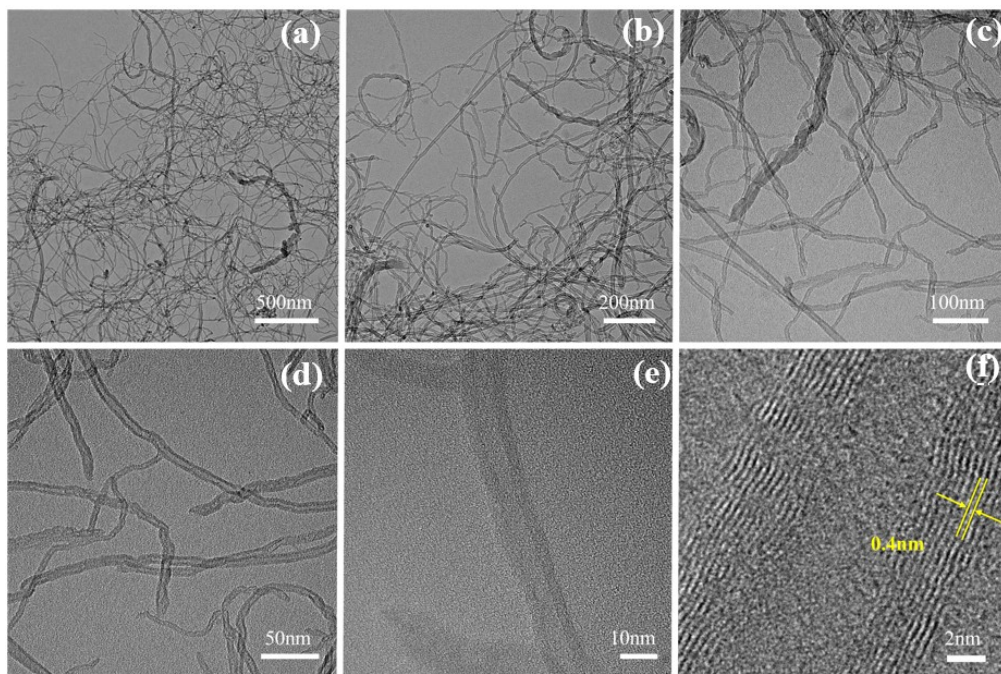

Figure S5 TEM images of NiFe(2,2'-bpy)<sub>2</sub>@CNT before OER after long-time ultrasonic processing

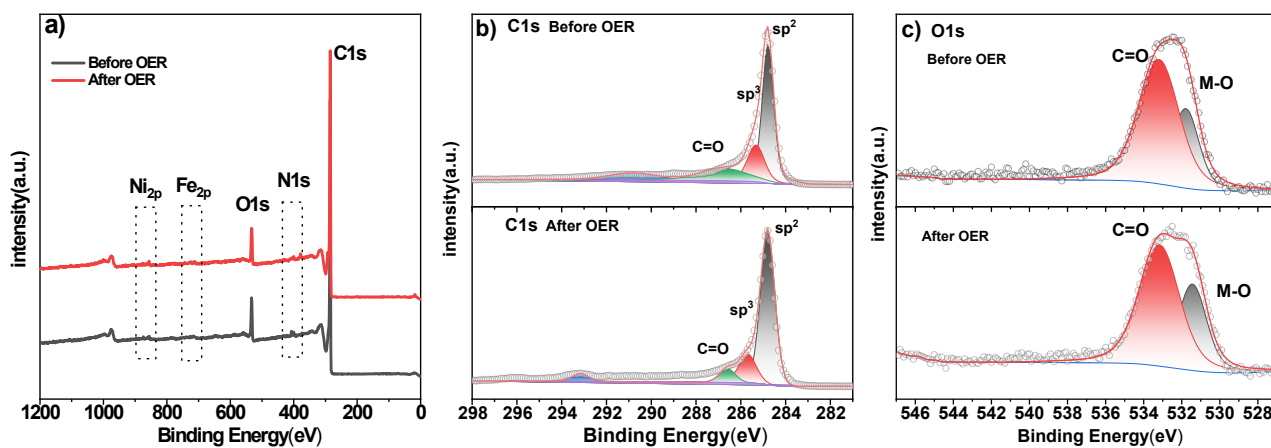



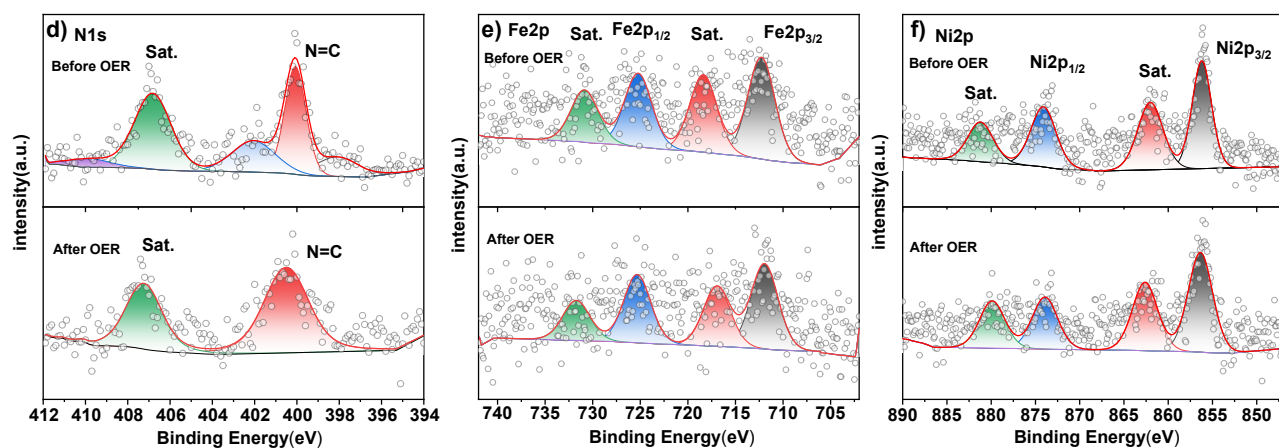

Figure S6. XPS survey spectra (a) and high-resolution XPS spectra of NiFe(2,2'-bpy)<sub>n</sub>@CNT before after OER (b-f).

Table S1 Ni/Fe content of best-performing sample, NiFe(2,2'-bpy)<sub>2</sub>@CNT determined from ICP after long-term durability i-t test

| Material                         | Fe(w%) | Ni(w%) |
|----------------------------------|--------|--------|
| NiFe(2,2'-bpy) <sub>2</sub> @CNT | 0.2%   | 0.1%   |

Table S2 Metal element content of experimental calculation values with the those obtained from high-resolution XPS fitting

(a) Experimental calculation values

| Material                         | CNT(w%) | Fe(w%) | Ni(w%) |
|----------------------------------|---------|--------|--------|
| NiFe@CNT                         | 85.19%  | 1.19%  | 1.25%  |
| NiFe(2,2'-bpy) <sub>1</sub> @CNT | 82.44%  | 1.16%  | 1.21%  |
| NiFe(2,2'-bpy) <sub>2</sub> @CNT | 79.87%  | 1.12%  | 1.17%  |
| NiFe(2,2'-bpy) <sub>3</sub> @CNT | 77.45%  | 1.09%  | 1.14%  |
| NiFe(2,2'-bpy) <sub>4</sub> @CNT | 75.18%  | 1.05%  | 1.10%  |
| NiFe(2,2'-bpy) <sub>5</sub> @CNT | 73.03%  | 1.02%  | 1.07%  |
| NiFe(2,2'-bpy) <sub>6</sub> @CNT | 71.00%  | 1.00%  | 1.04%  |

(b) Values obtained from high-resolution XPS fitting

| Before OER (NiFe(2,2'-bpy) <sub>2</sub> @CNT) |         |         |                 |          |          |          |          |
|-----------------------------------------------|---------|---------|-----------------|----------|----------|----------|----------|
| Name                                          | Peak BE | FWHM eV | Area (P) CPS.eV | Atomic % | Weight % | Atomic % | Weight % |
| C1s                                           | 284.85  | 0.77    | 102501.7        | 51.43    | 49.01    | 90.92    | 86.65    |
| C1s                                           | 285.88  | 2.51    | 54877.87        | 27.54    | 26.25    |          |          |
| C1s                                           | 290.46  | 3.37    | 23781.04        | 11.95    | 11.39    |          |          |
| N1s                                           | 400.19  | 1.52    | 3230.52         | 0.99     | 1.11     | 1.66     | 1.86     |
| N1s                                           | 407     | 1.08    | 2177.49         | 0.67     | 0.75     |          |          |
| O1s                                           | 531.73  | 1.52    | 5690.76         | 1.06     | 1.34     | 6.79     | 8.61     |
| O1s                                           | 532.98  | 2.89    | 30744.75        | 5.73     | 7.27     |          |          |

| Fe2p                                         | 712.27  | 3.37    | 2700.95         | 0.11     | 0.48     | 0.33  | 1.42  |
|----------------------------------------------|---------|---------|-----------------|----------|----------|-------|-------|
| Fe2p                                         | 725.22  | 3.37    | 1949.73         | 0.08     | 0.35     |       |       |
| Fe2p                                         | 730.86  | 3.37    | 1383.27         | 0.06     | 0.25     |       |       |
| Fe2p                                         | 717.6   | 3.37    | 1938.69         | 0.08     | 0.34     |       |       |
| Ni2p                                         | 856.2   | 2.57    | 3512.51         | 0.1      | 0.48     | 0.32  | 1.48  |
| Ni2p                                         | 874.09  | 3.37    | 2558.77         | 0.08     | 0.36     |       |       |
| Ni2p                                         | 862.02  | 3.37    | 2872.88         | 0.09     | 0.4      |       |       |
| Ni2p                                         | 881.2   | 3.37    | 1687.62         | 0.05     | 0.24     |       |       |
| After OER (NiFe(2,2'-bpy) <sub>2</sub> @CNT) |         |         |                 |          |          |       |       |
| Name                                         | Peak BE | FWHM eV | Area (P) CPS.eV | Atomic % | Weight % |       |       |
| C1s                                          | 284.8   | 0.75    | 104125.1        | 64.54    | 61.15    | 89.19 | 84.51 |
| C1s                                          | 285.7   | 0.91    | 23605.7         | 14.63    | 13.87    |       |       |
| C1s                                          | 293.16  | 0.83    | 5820.62         | 3.61     | 3.42     |       |       |
| C1s                                          | 286.6   | 0.83    | 10334.62        | 6.41     | 6.07     |       |       |
| N1s                                          | 400.49  | 3.3     | 3459.9          | 1.32     | 1.45     | 2.08  | 2.29  |
| N1s                                          | 407.17  | 2.34    | 2004.31         | 0.76     | 0.84     |       |       |
| O1s                                          | 531.25  | 1.6     | 6449.29         | 1.48     | 1.87     | 8.05  | 10.17 |
| O1s                                          | 532.92  | 2.98    | 28576.65        | 6.57     | 8.3      |       |       |
| Fe2p                                         | 711.94  | 3.37    | 1936.2          | 0.1      | 0.42     | 0.3   | 1.26  |
| Fe2p                                         | 725.33  | 3.37    | 1551.34         | 0.08     | 0.34     |       |       |
| Fe2p                                         | 716.94  | 3.37    | 1364.14         | 0.07     | 0.3      |       |       |
| Fe2p                                         | 731.72  | 3.37    | 908.38          | 0.05     | 0.2      |       |       |
| Ni2p                                         | 856.36  | 3.26    | 3839.47         | 0.14     | 0.65     | 0.39  | 1.76  |
| Ni2p                                         | 862.62  | 3.37    | 2594.36         | 0.1      | 0.44     |       |       |
| Ni2p                                         | 873.92  | 3.37    | 2066.55         | 0.08     | 0.35     |       |       |
| Ni2p                                         | 879.88  | 3.37    | 1875.38         | 0.07     | 0.32     |       |       |

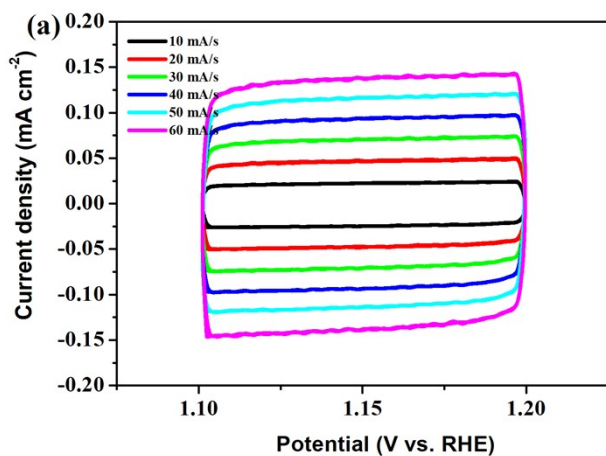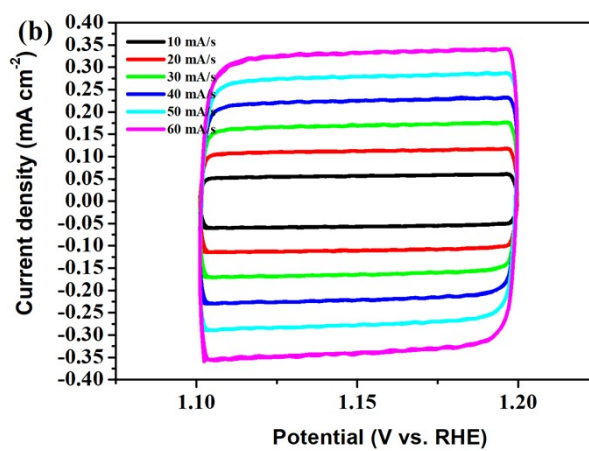

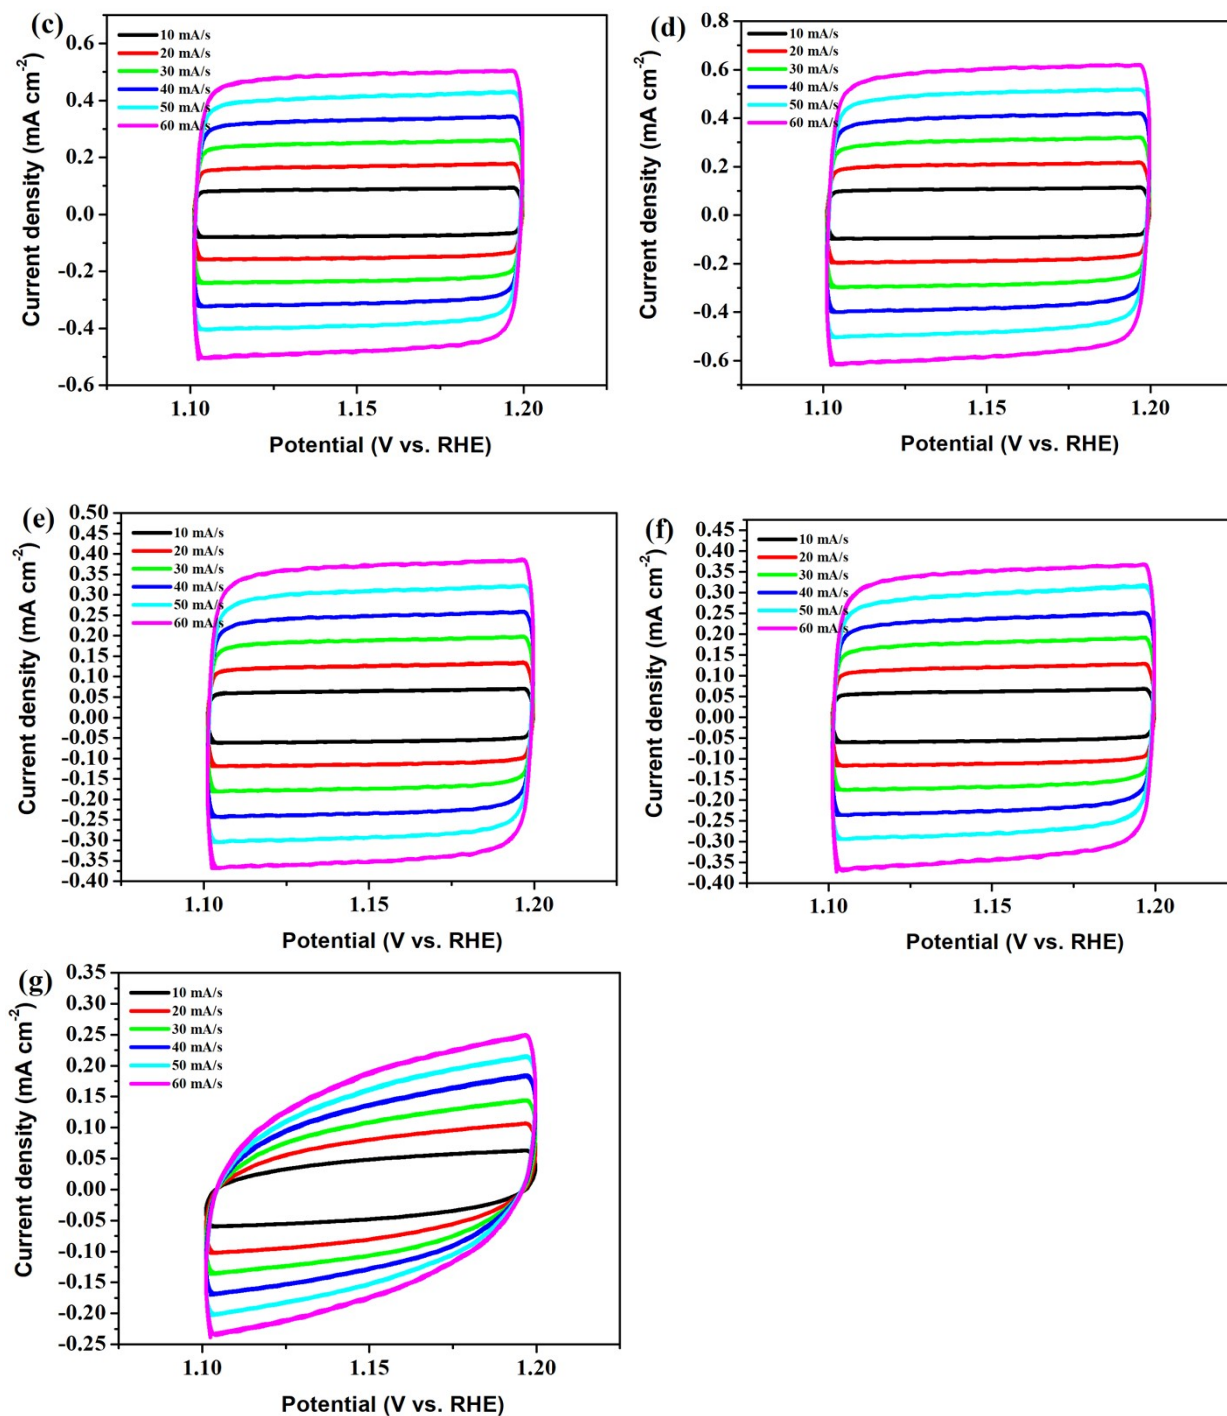

Figure S7 Electrochemical cyclic voltammetry curves of (a) NiFe@CNT, (b) NiFe(2,2'-bpy)@CNT, (c) NiFe(2,2'-bpy)<sub>2</sub>@CNT, (d) NiFe(2,2'-bpy)<sub>3</sub>@CNT, (e) NiFe(2,2'-bpy)<sub>4</sub>@CNT, (f) NiFe(2,2'-bpy)<sub>5</sub>@CNT and (g) NiFe(2,2'-bpy)<sub>6</sub>@CNT at different scanning rates

Table S3 Values of the double layer capacitance, electrochemical surface area and turnover frequency (TOF) of the catalysts.

| Material | Double layered capacitance ( $C_{dl}$ ) (mF cm <sup>-2</sup> ) | Electrochemical surface area (ECSA) (m <sup>2</sup> g <sup>-1</sup> ) | Turnover Frequency (TOF) (s <sup>-1</sup> ) |
|----------|----------------------------------------------------------------|-----------------------------------------------------------------------|---------------------------------------------|
| NiFe@CNT | 2.3                                                            | 28.4                                                                  | 0.9                                         |

|                                  |     |       |       |
|----------------------------------|-----|-------|-------|
| NiFe(2,2'-bpy) <sub>1</sub> @CNT | 5.5 | 67.9  | 1.67  |
| NiFe(2,2'-bpy) <sub>2</sub> @CNT | 8.1 | 100   | 1.86  |
| NiFe(2,2'-bpy) <sub>3</sub> @CNT | 9.9 | 122.2 | 1.27  |
| NiFe(2,2'-bpy) <sub>4</sub> @CNT | 6.1 | 75.3  | 0.17  |
| NiFe(2,2'-bpy) <sub>5</sub> @CNT | 5.8 | 71.6  | 0.011 |
| NiFe(2,2'-bpy) <sub>6</sub> @CNT | 2.8 | 34.6  | 0.007 |

Note:

$$C_{dl} = I/v;$$

$$ECSA = C_{dl}/(C_s \cdot m);$$

$$TOF = jS/(4nF)$$

(where  $I$  is the capacitive current ( $\text{mA cm}^{-2}$ ) and  $v$  is the scan rate ( $\text{mV s}^{-1}$ );  $C_s$  is the specific capacitance of a planar surface ( $0.04 \text{ mF cm}^{-2}$ ), and  $m$  is the loading amount of catalysts on the surface of glassy carbon electrode in this work: ca.  $2 \text{ g/m}^2$ ;  $j$  ( $\text{mA cm}^{-2}$ ) is the measured current density at a given overpotential  $\eta = 300 \text{ mV}$ ,  $S$  ( $0.1963 \text{ cm}^2$ ) is the surface area of GCE electrode,  $n$  is the total mole of metal atoms on the electrode,  $F$  ( $96485 \text{ C mol}^{-1}$ ) is Faraday constant, the number of 4 means that 4 electrons transfer per  $\text{O}_2$  molecule. )

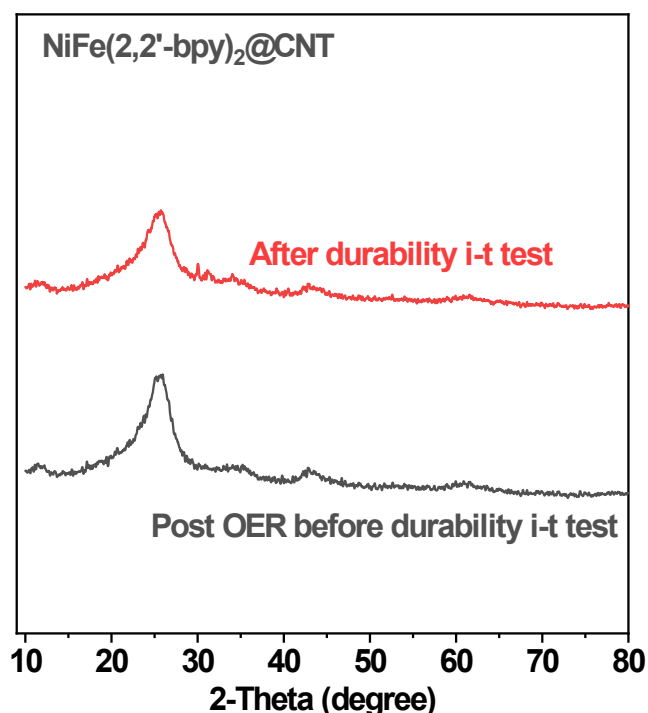

Figure S8 XRD of the best-performing sample, NiFe(2,2'-bpy)<sub>2</sub>@CNT before and after long-term durability i-t test



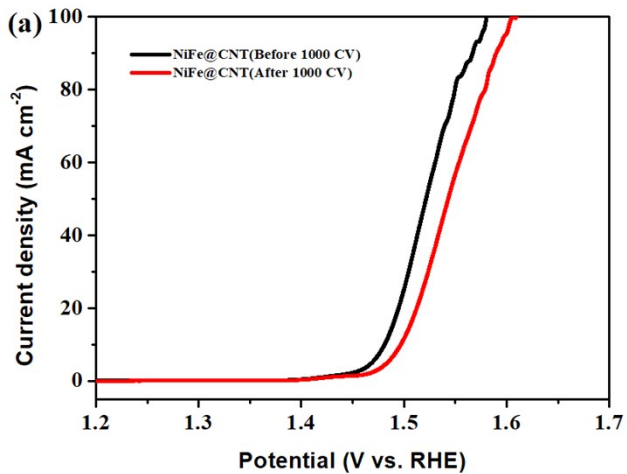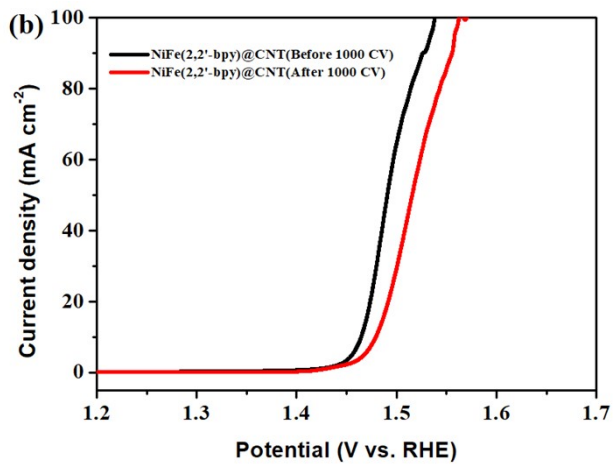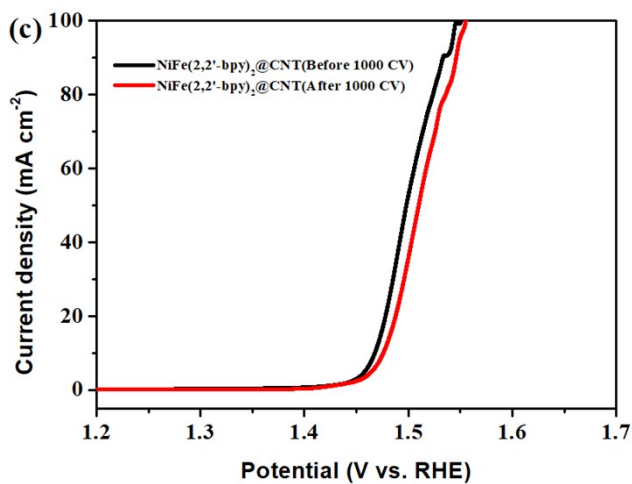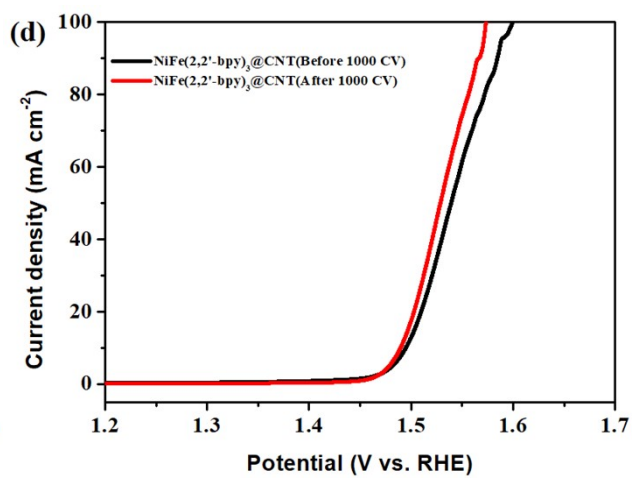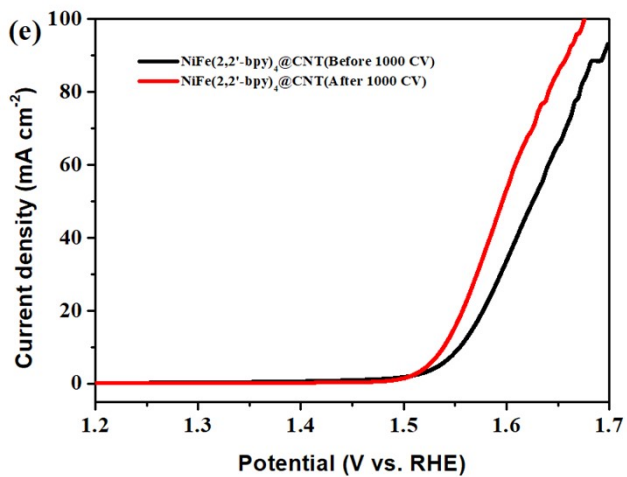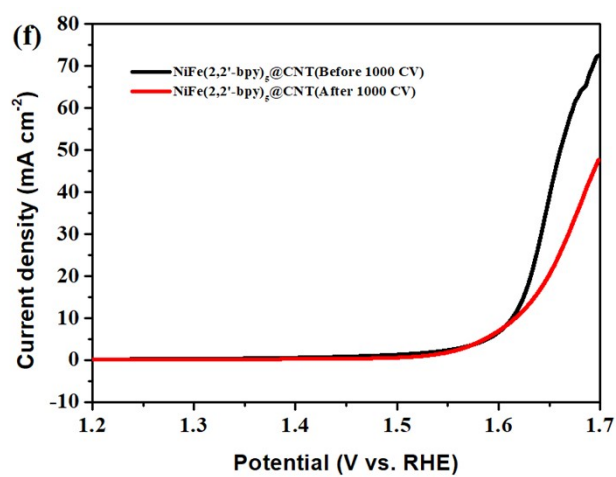

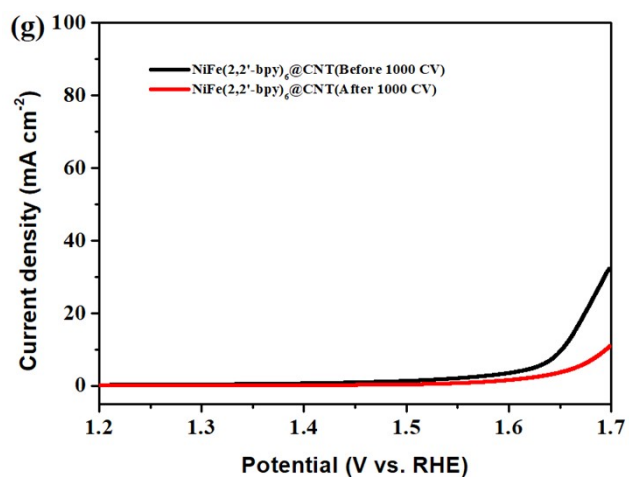

Figure S9 LSV curves of  $\text{NiFe}(2,2'\text{-bpy})_n\text{@CNT}$  before and after 1000 CV cycles at 1.2–1.7 V

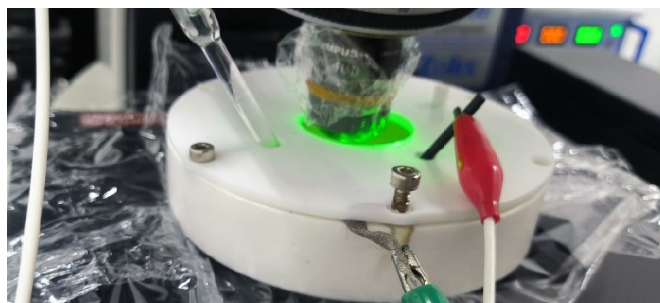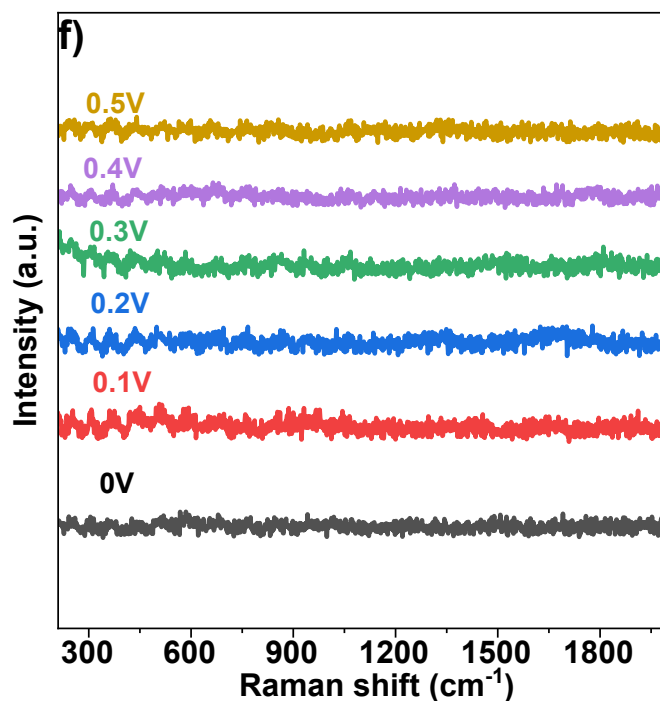

Figure S10 In Situ Raman Spectroscopy measurement of  $\text{NiFe}(2,2'\text{-bpy})_2$  at different applied potential.

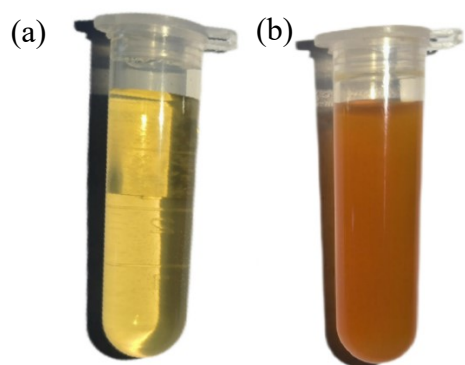

Figure S11 (a) Depicts the outcome of NiFe(2,2-bpy)<sub>2</sub> drops in water; (b) shows the result of NiFe(2,2-bpy)<sub>2</sub> drops in a 1M KOH solution.

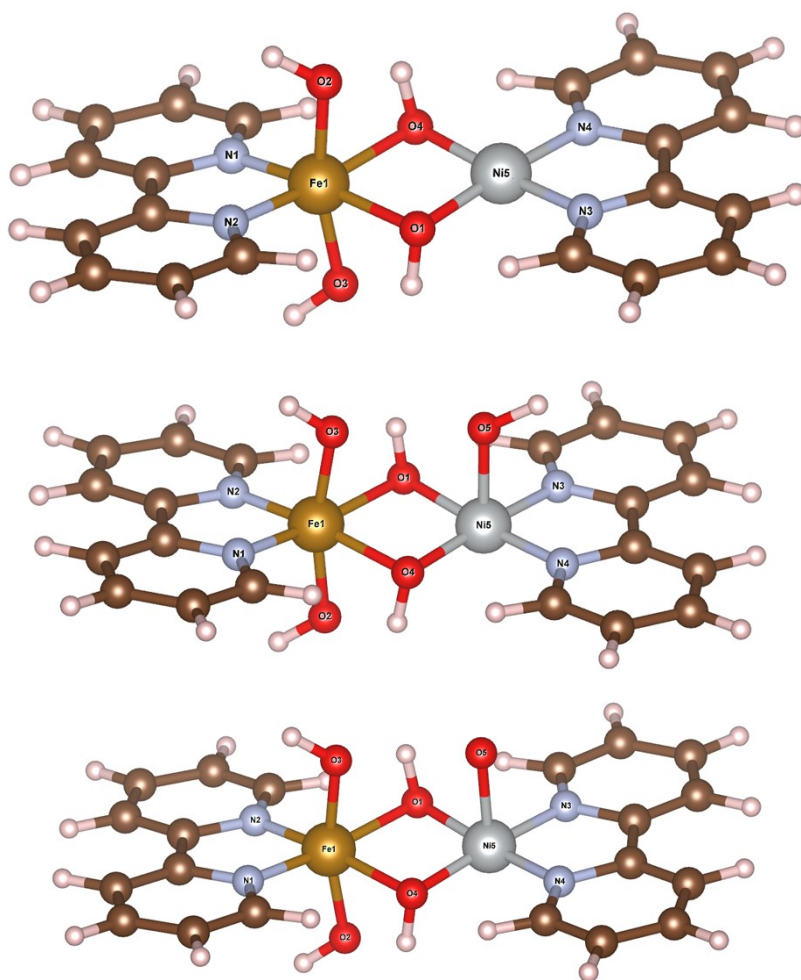

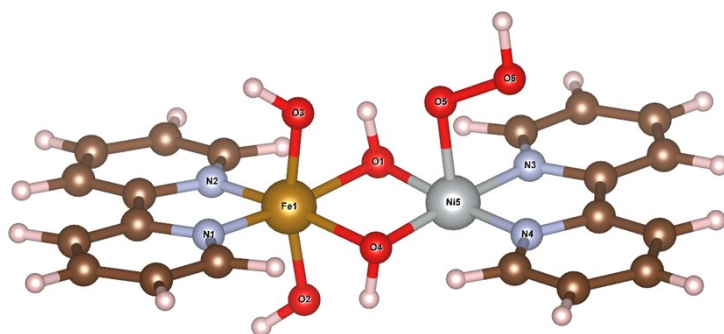

(a) Catalytic intermediates \*, \*OH, \*O, \*OOH (\* = NiFe(OH)<sub>4</sub>(2,2'-bpy)<sub>2</sub>)

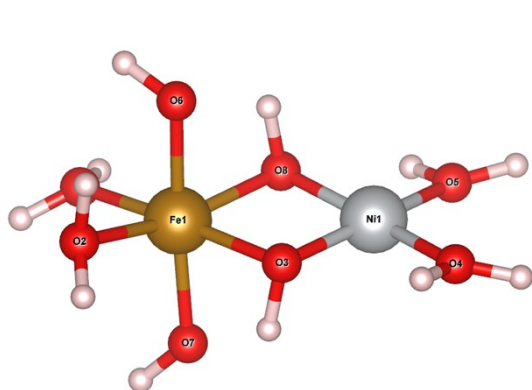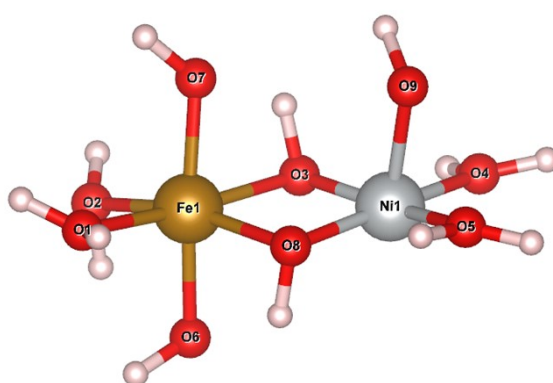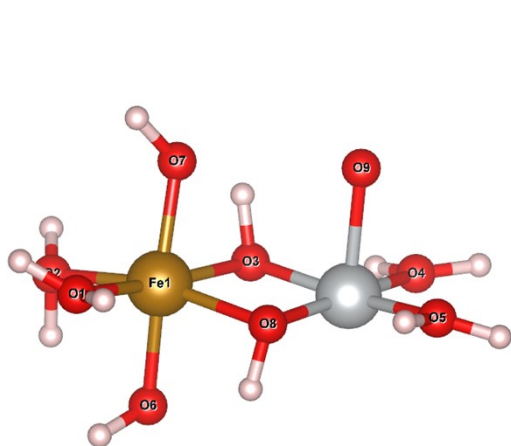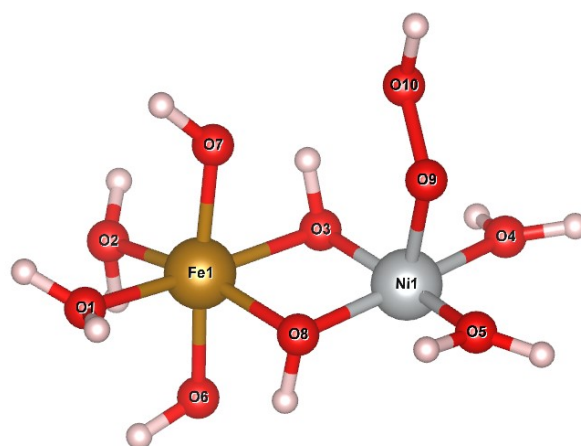

(b) Catalytic intermediates \*, \*OH, \*O, \*OOH (\* = NiFe(OH)<sub>4</sub>(H<sub>2</sub>O)<sub>4</sub>)

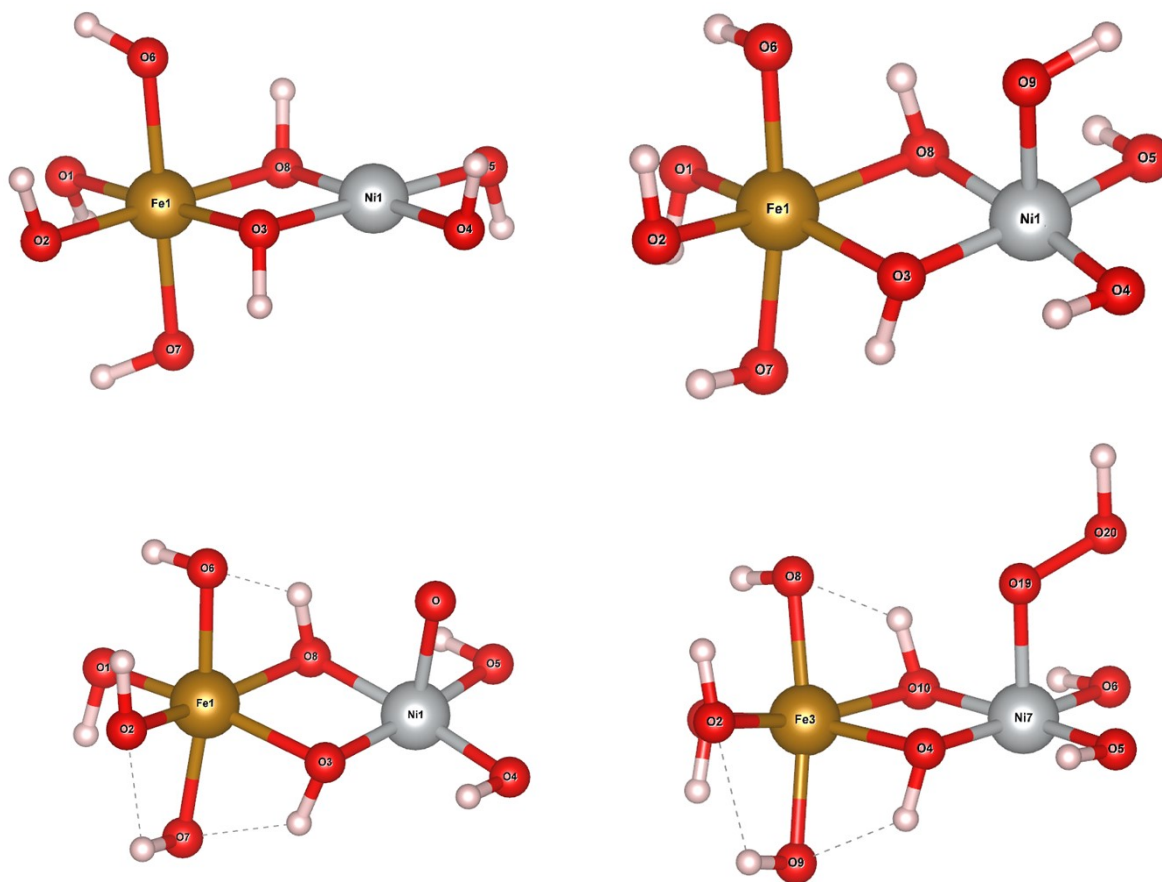

(c) Catalytic intermediates \*, \*OH, \*O, \*OOH (\* = NiFe(OH)<sub>8</sub>)

Figure S12 The molecular models used for DFT calculation described in the Text

Table S4 Comparison of OER performance of catalysts in 1 M KOH

| Materials                                              | 10 mA cm <sup>-2</sup> overpotential mV | Tafel slope mV dec <sup>-1</sup> | Substrate        | TOF value s <sup>-1</sup> | Stability (10 mA/cm <sup>2</sup> ) | Reference |
|--------------------------------------------------------|-----------------------------------------|----------------------------------|------------------|---------------------------|------------------------------------|-----------|
| NiFe(2,2'-bpy) <sub>2</sub> @CNT                       | 240                                     | 42.4                             | GCE <sup>a</sup> | 1.86                      | 15 h                               | This work |
| a-CoPSe                                                | 223mV @ 100 mA/cm <sup>2</sup>          | 32                               | NF               | 35.7                      | 100 h at 100 mA/cm <sup>2</sup>    | 1         |
| Fe <sup>2+</sup> -NiFe LDH                             | 249                                     | 40.3                             | CFP              | 0.09                      | 15h                                | 2         |
| NiCo <sub>2-x</sub> Fe <sub>x</sub> O <sub>4</sub> NBs | 274                                     | 42                               | CFP              | 0.016                     | 25h                                | 3         |
| 30% Ce-NiFe-LDH                                        | 242                                     | 34                               | GCE              | 0.011                     | 24h                                | 4         |
| NiFe LDH-UF                                            | 254                                     | 32                               | GCE              | 0.06                      | 12h                                | 5         |
| HG-NiFe                                                | 310                                     | 39                               | GCE              | 0.53                      | 5.5h                               | 6         |
| Fe-doped-(Ni-MOFs)/FeOOH                               | 210 mV @ 15 mA/cm <sup>2</sup>          | 50                               | NF               | 56.8                      | 120 h                              | 7         |
| FeOOH@NiFe LDH(0.2 M )                                 | 252mV @ 100 mA/cm <sup>2</sup>          | 51.49                            | NF               | 4.61                      | 100 h at 100 mA/cm <sup>2</sup>    | 8         |



|                                          |                                   |      |     |       |                                 |    |
|------------------------------------------|-----------------------------------|------|-----|-------|---------------------------------|----|
| Ni-MIL-53-Fc                             | 297 mV<br>@ 50 mA/cm <sup>2</sup> | 60.2 | CFP | 1.25  | -                               | 9  |
| NiFe LDH nanomesh                        | 268 mV<br>@ 50 mA/cm <sup>2</sup> | 30   | GCE | 1.49  | 48h                             | 10 |
| FeNi LDH sheet/FeNi                      | 130                               | 39   | NF  | 0.072 | 10h                             | 11 |
| NiFeV LDHs                               | 192                               | 42   | NF  | 0.04  | 18h                             | 12 |
| Ni <sub>0.67</sub> Fe <sub>0.33</sub> /C | 210                               | 35   | GCE | 0.3   | 28h at 40<br>mA/cm <sup>2</sup> | 13 |
| CoFe LDH HNC                             | 238                               | 42   | NF  | 0.05  | 50 h                            | 14 |

<sup>a</sup>GCE = Glassy Carbon Electrode; NF = Nickel foam; CFP = Carbon Fiber Paper

- (1) Shi, Y.; Zhou, S. L.; Liu, J. X.; Zhang, X.; Yin, J.; Zhan, T. R.; Yang, Y.; Li, G. J.; Lai, J. P.; Wang, L., An Integrated Amorphous Cobalt Phosphoselenide Electrocatalyst with High Mass Activity Boosts Alkaline Overall Water Splitting. *Appl. Catal. B Environ.* **2024**, *341*, 123326.
- (2) Cai, Z.; Zhou, D. J.; Wang, M. Y.; Bak, S. M.; Wu, Y. S.; Wu, Z. S.; Tian, Y.; Xiong, X. Y.; Li, Y. P.; Liu, W.; Siahrostami, S.; Kuang, Y.; Yang, X. Q.; Duan, H. H.; Feng, Z. X.; Wang, H. L.; Sun, X. M., Introducing Fe<sup>2+</sup> into Nickel-Iron Layered Double Hydroxide: Local Structure Modulated Water Oxidation Activity. *Angew. Chem., Int. Ed.* **2018**, *57*, 9392-9396.
- (3) Huang, Y.; Zhang, S. L.; Lu, X. F.; Wu, Z. P.; Luan, D. Y.; Lou, X. W., Trimetallic Spinel NiCo<sub>2-x</sub>Fe<sub>x</sub>O<sub>4</sub> Nanoboxes for Highly Efficient Electrocatalytic Oxygen Evolution. *Angew. Chem., Int. Ed.* **2021**, *60*, 11841-11846.
- (4) Xu, H. J.; Shan, C. F.; Wu, X. X.; Sun, M. Z.; Huang, B. L.; Tang, Y.; Yan, C. H., Fabrication of Layered Double Hydroxide Microcapsules Mediated by Cerium Doping in Metal-Organic Frameworks for Boosting Water Splitting. *Energy Environ. Sci.* **2020**, *13*, 2949-2956.
- (5) Zhao, Y. F.; Zhang, X.; Jia, X. D.; Waterhouse, G. I. N.; Shi, R.; Zhang, X. R.; Zhan, F.; Tao, Y.; Wu, L. Z.; Tung, C. H.; O'Hare, D.; Zhang, T. R., Sub-3 nm Ultrafine Monolayer Layered Double Hydroxide Nanosheets for Electrochemical Water Oxidation. *Adv. Energy Mater.* **2018**, *8*, 1703585.
- (6) Wang, J.; Gan, L. Y.; Zhang, W. Y.; Peng, Y. C.; Yu, H.; Yan, Q. Y.; Xia, X. H.; Wang, X., In Situ Formation of Molecular Ni-Fe Active Sites on Heteroatom-Doped Graphene as a Heterogeneous Electrocatalyst toward Oxygen Evolution. *Sci. Adv.* **2018**, *4*, eaap7970.
- (7) Li, C. F.; Xie, L. J.; Zhao, J. W.; Gu, L. F.; Tang, H. B.; Zheng, L. R.; Li, G. R., Interfacial Fe-O-Ni-O-Fe Bonding Regulates the Active Ni Sites of Ni-Mofs Via Iron Doping and Decorating with FeOOH for Super-Efficient Oxygen Evolution. *Angew. Chem., Int. Ed.* **2022**, *61*, e202116934.
- (8) Li, Y.; Wu, Y. Y.; Yuan, M. K.; Hao, H. R.; Lv, Z.; Xu, L. L.; Wei, B., Operando Spectroscopies Unveil Interfacial FeOOH Induced Highly Reactive  $\beta$ -Ni(Fe)OOH for Efficient Oxygen Evolution. *Appl. Catal., B* **2022**, *318*, 121825.
- (9) Xu, Z. Z.; Tao, Y.; Sun, Z. D.; Bi, P. Y.; Zhong, X.; Liao, J. J.; Hao, D. C.; Yang, L. C.; Xu, L.; Luo, M. B.; Pan, K. C.; Gao, Z., Ligand-Engineered Ni-Based Metal-Organic Frameworks for Electrochemical Oxygen Evolution Reaction. *Chem. Eng. J.* **2023**, *478*, 147418.
- (10) Xie, J. F.; Xin, J. P.; Wang, R. X.; Zhang, X. D.; Lei, F. C.; Qu, H. C.; Hao, P.; Cui, G. W.; Tang, B.; Xie, Y., Sub-3 nm Pores in Two-Dimensional Nanomesh Promoting the Generation of Electroactive Phase for Robust Water Oxidation. *Nano Energy* **2018**, *53*, 74-82.
- (11) Xiang, Q.; Li, F.; Chen, W. L.; Ma, Y. L.; Wu, Y.; Gu, X.; Qin, Y.; Tao, P.; Song, C. Y.; Shang, W.; Zhu, H.; Deng, T.; Wu, J. B., In Situ Vertical Growth of Fe-Ni Layered Double-Hydroxide Arrays on Fe-Ni Alloy Foil: Interfacial Layer Enhanced Electrocatalyst with Small Overpotential for Oxygen Evolution Reaction. *ACS Energy Lett.* **2018**, *3*, 2357-2365.
- (12) Li, P. S.; Duan, X. X.; Kuang, Y.; Li, Y. P.; Zhang, G. X.; Liu, W.; Sun, X. M., Tuning Electronic Structure of NiFe

Layered Double Hydroxides with Vanadium Doping toward High Efficient Electrocatalytic Water Oxidation. *Adv. Energy Mater.* **2018**, *8*, 1703341.

(13) Yin, S. M.; Tu, W. G.; Sheng, Y.; Du, Y. H.; Kraft, M.; Borgna, A.; Xu, R., A Highly Efficient Oxygen Evolution Catalyst Consisting of Interconnected Nickel-Iron-Layered Double Hydroxide and Carbon Nanodomains. *Adv. Mater.* **2018**, *30*, 1705106.

(14) Ni, Y. M.; Shi, D. R.; Mao, B. G.; Wang, S. H.; Wang, Y.; Ahmad, A.; Sun, J. L.; Song, F.; Cao, M. H.; Hu, C. W., Under-Coordinated CoFe Layered Double Hydroxide Nanocages Derived from Nanoconfined Hydrolysis of Bimetal Organic Compounds for Efficient Electrocatalytic Water Oxidation. *Small* **2023**, *19*, 2302556.
